# Supplementary material for: Transient Neonatal Diabetes, ZFP57, and Hypomethylation of Multiple Imprinted Loci
Source: Oxford University Press journal article supplement (doi:10.2337/dc12-0700), 2012-11-14
Supplement: dc120700supplementarydata.pdf [file dc120700supplementarydata.pdf]

SUPPLEMENTARY DATA

**Supplementary Table 1.** Genotypes and epigenotypes of the 14 *ZFP57*<sup>mut/mut</sup> and 25 *ZFP57*<sup>+/-mut</sup> individuals

| Family                                 |      | Genotype | Exon | Predicted effect on protein                                            | TNDM1 | <i>GRB10</i> | <i>PEG3</i> | <i>PEG1</i> | <i>KCNQ10T1</i> | <i>NESPAS</i> |
|----------------------------------------|------|----------|------|------------------------------------------------------------------------|-------|--------------|-------------|-------------|-----------------|---------------|
| Family 1<br>723C>A=<br>C241X           | I-1  | +/-mut   |      |                                                                        | N     | N            | N           | N           | N               | N             |
|                                        | I-2  | +/-mut   |      |                                                                        | N     | N            | N           | N           | N               | N             |
|                                        | II-1 | mut/mut  | 6    | Premature stop codon, result: Truncated protein                        | T     | T            | P           | P           | P               | P             |
|                                        | II-2 | mut/mut  | 6    | Premature stop codon, result: Truncated protein                        | T     | T            | P           | P           | P               | N             |
|                                        | II-3 | +/-mut   |      |                                                                        | N     | N            | N           | N           | N               | N             |
| Family 2<br>257_258delAG=<br>E86VfsX28 | I-1  | +/-mut   |      |                                                                        | N     | N            | N           | N           | N               | N             |
|                                        | I-2  | mut/mut  | 5    | Frameshift introducing premature stop codon, result: Truncated protein | T     | P            | P           | N           | N               | N             |
|                                        | II-1 | mut/mut  | 5    | Frameshift introducing premature stop codon, result: Truncated protein | T     | P            | P           | N           | N               | N             |
|                                        | II-2 | +/-mut   |      |                                                                        | N     | N            | N           | N           | N               | N             |
|                                        | II-3 | mut/mut  | 5    | Frameshift introducing premature stop codon, result: Truncated protein | T     | T            | P           | N           | N               | N             |
| Family 3<br>1323delC=<br>G441GfsX17    | I-1  | +/-mut   |      |                                                                        | N     | N            | N           | N           | N               | N             |
|                                        | I-2  | +/-mut   |      |                                                                        | NK*   | NK*          | NK*         | N           | N               | N             |
|                                        | II-1 | mut/mut  | 6    | Frameshift introducing premature stop codon, result: Truncated protein | T     | P            | P           | N           | N               | N             |
|                                        | II-2 | +/-mut   |      |                                                                        | N     | N            | N           | N           | N               | N             |
| Family 4<br>1312C>G=                   | I-1  | +/-mut   |      |                                                                        | N     | N            | N           | N           | N               | N             |
|                                        | I-2  | +/-mut   |      |                                                                        | N     | N            | N           | N           | N               | N             |

SUPPLEMENTARY DATA

|                                                                         |       |                                     |   |                                                                                       |     |     |     |     |     |     |
|-------------------------------------------------------------------------|-------|-------------------------------------|---|---------------------------------------------------------------------------------------|-----|-----|-----|-----|-----|-----|
| H438D                                                                   | II-1  | mut/mut                             | 6 | Conserved residue involving metal ion-binding amino acid histidine. Probably damaging | T   | P   | P   | N   | N   | N   |
| Family 5<br>683G>A=<br>R228H                                            | I-1   | +/mut                               |   |                                                                                       | NK† | NK† | NK† | NK† | NK† | NK† |
|                                                                         | I-2   | +/mut                               |   |                                                                                       | N   | N   | N   | N   | N   | N   |
|                                                                         | II-1  | mut/mut                             | 6 | Conserved residue involving metal ion-binding amino acid histidine. Probably damaging | T   | P   | P   | N   | N   | N   |
| Family 6<br>769C>A=<br>H257N                                            | I-1   | +/mut                               |   |                                                                                       | N   | N   | N   | N   | N   | N   |
|                                                                         | I-2   | +/mut                               |   |                                                                                       | N   | N   | N   | N   | N   | P   |
|                                                                         | II-1  | mut/mut                             | 6 | Conserved residue involving metal ion-binding amino acid histidine. Probably damaging | T   | T   | P   | N   | P   | N   |
|                                                                         | II-2  | +/mut                               |   |                                                                                       | N   | N   | N   | N   | N   | N   |
|                                                                         | III-1 | -                                   |   |                                                                                       | -   | -   | -   | -   | -   | -   |
|                                                                         | III-2 | mut/mut                             | 6 | Conserved residue involving metal ion-binding amino acid histidine. Probably damaging | T   | P   | P   | N   | N   | N   |
| Family 7<br>683G>A=<br>R228H<br>+<br>837_844del<br>CACCCAGG<br>=279fsX1 | I-1   | +/mut<br>837_844del<br>CACCCAG<br>G |   |                                                                                       | N   | N   | N   | N   | N   | N   |
|                                                                         | I-2   | +/mut<br>683G>A                     |   |                                                                                       | N   | N   | N   | N   | N   | N   |

# SUPPLEMENTARY DATA

|                                                              |      |                                      |   |                                                                                                                                                                 |   |   |   |   |   |   |
|--------------------------------------------------------------|------|--------------------------------------|---|-----------------------------------------------------------------------------------------------------------------------------------------------------------------|---|---|---|---|---|---|
|                                                              | II-1 | +/-mut<br>837_844del<br>CACCCAG<br>G |   |                                                                                                                                                                 | N | T | N | N | N | P |
|                                                              | II-2 | +/-mut<br>683G>A                     |   |                                                                                                                                                                 | P | P | N | N | N | P |
|                                                              | II-3 | mut/mut                              | 6 | Frameshift introducing premature stop codon and missense mutation affects conserved residue involving metal ion-binding amino acid histidine. Probably damaging | T | T | P | P | N | P |
| Family 8<br>398delT=<br>L133HfsX49                           | I-1  | +/-mut                               |   |                                                                                                                                                                 | N | N | N | N | N | N |
|                                                              | I-2  | +/-mut                               |   |                                                                                                                                                                 | N | N | N | N | N | N |
|                                                              | II-1 | mut/mut                              | 6 | Frameshift introducing premature stop codon                                                                                                                     | T | P | P | N | N | N |
| Family 9<br>398delT=<br>L133HfsX49<br>+<br>760C>T =<br>L254F | I-1  | +/-mut<br>398delT                    |   |                                                                                                                                                                 | N | N | N | N | N | N |
|                                                              | I-2  | +/-mut<br>760C>T                     |   |                                                                                                                                                                 | N | N | N | N | N | N |
|                                                              | II-2 | mut/mut                              | 6 | Frameshift introducing premature stop codon and missense mutation affects non-conserved residue but is probably damaging                                        | T | P | P | N | N | N |

# SUPPLEMENTARY DATA

|                               |      |         |   |                                              |   |   |   |   |   |   |
|-------------------------------|------|---------|---|----------------------------------------------|---|---|---|---|---|---|
| Family 10<br>682C>T=<br>R228C | I-1  | +/mut   |   |                                              | N | N | N | N | N | N |
|                               | I-2  | +/mut   |   |                                              | N | N | N | N | N | N |
|                               | II-1 | mut/mut | 6 | Affects conserved residue. Probably damaging | T | P | P | N | N | N |

I-III generation number followed by individual number of each individual; mut/mut, *ZFP57* homozygous or compound heterozygous individuals (highlighted in black boxes); +/mut, *ZFP57* heterozygous individuals; TNDM1, DMR TNDM1; *GRB10*, DMR *GRB10*; *PEG3*, DMR *PEG3*; *PEG1*, DMR *PEG1*; *KCNQ1OT1*, DMR *KCNQ1OT1*; *NESPAS*, DMR *NESPAS*; N in white, normal methylation; T in dark gray, total loss of methylation; P in light gray, partial hypomethylation (> 3SD from the normal control range); NK, not known; \*, MS-PCR failed; †, no results due to poor quality DNA.

Numbering of sequence variations according to den Dunnen and Antonarakis (21). Of notice: the 8 bp deletion in family 7 has changed base pair numbers to the more correct base pair numbers in this paper compared to our previous publication (5). The predicted effect on protein is obtained by entering the *ZFP57* alterations in the SIFT database, a sequence homology-based tool that sorts intolerant from tolerant amino acid substitutions (<http://sift.jcvi.org/>) and the PolyPhen-2 database, Polymorphism Phenotyping (<http://genetics.bwh.harvard.edu/pph2/>).

# SUPPLEMENTARY DATA

**Supplementary Table 2.** Detailed clinical phenotypes of the 14 *ZFP57* homozygous and compound heterozygous individuals, 12 affected individuals and 2 non-affected individuals.

|                                  | Family 1                                                                                                                |                                                  | Family 2                    |                                                      |                                  | Family 3                             | Family 4                        | Family 5                                             | Family 6                            |                                                     | Family 7                           | Family 8                          | Family 9                         | Family 10                          |
|----------------------------------|-------------------------------------------------------------------------------------------------------------------------|--------------------------------------------------|-----------------------------|------------------------------------------------------|----------------------------------|--------------------------------------|---------------------------------|------------------------------------------------------|-------------------------------------|-----------------------------------------------------|------------------------------------|-----------------------------------|----------------------------------|------------------------------------|
|                                  | II-1 affected individual                                                                                                | II-2 affected individual                         | I-2 non-affected individual | II-1 non-affected individual                         | II-3 affected individual         | II-1 affected individual             | II-1* affected individual       | II-1* affected individual                            | II-1 affected individual            | III-2 affected individual                           | II-3 affected individual           | II-1 affected individual          | II-1 affected individual         | II-2 affected individual           |
| Coefficient of consanguinity (F) | 1/8                                                                                                                     | 1/8                                              | 1/16                        | 5/32                                                 | 5/32                             | 1/32                                 | 5/64                            | 1/16                                                 | nk                                  | nk                                                  | n/a                                | n/a                               | n/a                              | n/a                                |
| Neonatal diabetes history        | Glucosuria, no ketoacidosis, nonfasting C-peptide < 160pmol/l, no diabetes-associated antibodies. TND on insulin for 7m | Glucosuria, no ketonuria. NDM on insulin for 11m | No                          | No                                                   | TND on insulin for 3.5m          | TND on insulin for 4m                | TND on insulin for 1m           | TND on insulin for 4m                                | TND on insulin for 4m               | TND on insulin for 5m                               | TND on insulin for 1½m             | TND on insulin for 18m            | NDM on insulin for 14½m          | TND on insulin for 1m              |
| Sex                              | F                                                                                                                       | F                                                | M                           | F                                                    | F                                | M                                    | M                               | M                                                    | F                                   | F                                                   | M                                  | M                                 | F                                | F                                  |
| Birth weight (percentile)        | 2430g at term (0.4 <sup>th</sup> - 2 <sup>nd</sup> )                                                                    | 2000g at term (< 0.4 <sup>th</sup> )             | nk                          | 2400g at term (0.4 <sup>th</sup> - 2 <sup>nd</sup> ) | 2523g at term (2 <sup>nd</sup> ) | 1920g at term (< 0.4 <sup>th</sup> ) | 1745g at 33w (2 <sup>nd</sup> ) | 2500g at term (0.4 <sup>th</sup> - 2 <sup>nd</sup> ) | 2000g at term (<0.4 <sup>th</sup> ) | 2660g at term (9 <sup>th</sup> - 25 <sup>th</sup> ) | 2350g at term (0.4 <sup>th</sup> ) | 1900g at 38w (0.4 <sup>th</sup> ) | 2000g at 34w (25 <sup>th</sup> ) | 2200g at term (0.4 <sup>th</sup> ) |
| Birth length (percentile)        | 49cm (25 <sup>th</sup> )                                                                                                | 45cm (0.4 <sup>th</sup> )                        | nk                          | nk                                                   | nk                               | nk                                   | nk                              | 50cm (25 <sup>th</sup> - 50 <sup>th</sup> )          | 45cm (0.4 <sup>th</sup> )           | 46cm (2 <sup>nd</sup> - 9 <sup>th</sup> )           | nk                                 | 48cm (25 <sup>th</sup> )          | nk                               | 42cm (<<0.4 <sup>th</sup> )        |

# SUPPLEMENTARY DATA

|                           |                                                              |                         |    |                            |                               |                               |                        |                                           |                                              |                                             |                                       |    |    |                        |
|---------------------------|--------------------------------------------------------------|-------------------------|----|----------------------------|-------------------------------|-------------------------------|------------------------|-------------------------------------------|----------------------------------------------|---------------------------------------------|---------------------------------------|----|----|------------------------|
| OFC at birth (percentile) | 30cm (< 0.4 <sup>th</sup> )                                  | 32cm (2 <sup>nd</sup> ) | nk | nk                         | 33.5cm (25 <sup>th</sup> )    | nk                            | nk                     | 34cm (9 <sup>th</sup> -25 <sup>th</sup> ) | 31.5cm (0.4 <sup>th</sup> -2 <sup>nd</sup> ) | nk                                          | 3 <sup>rd</sup> percentile            | nk | nk | nk                     |
| Weight catch-up           | Yes 3m (91 <sup>st</sup> )                                   | No                      | nk | Yes 7m (99 <sup>th</sup> ) | Yes 5m (25-50 <sup>th</sup> ) | Yes 7m (25-50 <sup>th</sup> ) | Yes 1m 9 <sup>th</sup> | nk                                        | Yes 9m 50 <sup>th</sup>                      | nk                                          | Yes 10m 90 <sup>th</sup>              | nk | nk | nk                     |
| Umbilical abnormality     | Hernia of the cord (persistent omphalo-enteric duct; 5x3 cm) | Umbilical hernia        | No | No                         | No                            | No                            | No                     | No                                        | No                                           | No                                          | Yes                                   | No | nk | No                     |
| Macroglossia              | Yes                                                          | Yes                     | nk | nk                         | Yes                           | Yes                           | Yes                    | No                                        | Yes                                          | Yes                                         | Yes                                   | No | nk | No                     |
| Congenital heart disease  | Patent ductus arteriosus                                     | Atrial septal defect    | No | No                         | No                            | No                            | Fallot tetralogy       | No                                        | No                                           | A "hole in the heart", healed spontaneously | No                                    | No | nk | No                     |
| Evidence of asymmetry     | No                                                           | No                      | No | No                         | No                            | No                            | No                     | No                                        | nk                                           | No                                          | Hemihypertrophy of left arm, left leg | No | nk | Hemihypertrophy of leg |

# SUPPLEMENTARY DATA

|                                |                                              |                                                          |    |    |                            |                                                                                                          |    |                                          |    |                            |                                                        |    |    |                                                              |
|--------------------------------|----------------------------------------------|----------------------------------------------------------|----|----|----------------------------|----------------------------------------------------------------------------------------------------------|----|------------------------------------------|----|----------------------------|--------------------------------------------------------|----|----|--------------------------------------------------------------|
| Other congenital abnormalities | Bilateral postaxial polydactyly of the hands | Tracheomalacia                                           | No | No | No                         | Clinodactyly. Bilateral failure of flexion at interphalangeal joints, 5 <sup>th</sup> digit              | No | Hydrocele                                | No | A minor oesophageal hernia | Pectus carinatum. 5 <sup>th</sup> finger clinodactyly. | No | nk | Pectus carinatum.                                            |
| Other dysmorphic features      | No                                           | Bilateral ear lobe creases                               | No | No | Bilateral ear lobe creases | Hypertelorism. Micrognathia despite macroglossia. Deficient ear lobes with deep unusual anterior creases | No | No                                       | No | No                         | Prognathism                                            | No | nk | No                                                           |
| Epilepsy                       | No                                           | Severe epilepsy. EEG highly abnormal. Status epilepticus | No | No | No                         | Central apnoea. Possible epilepsy                                                                        | nk | One epileptic seizure in neonatal period | No | No                         | No                                                     | No | nk | One episode of seizure at 4y (possible due to hypoglycaemia) |

# SUPPLEMENTARY DATA

|                         |                                                       |                                 |                   |        |        |                                                                         |                           |                                                 |                                                                |        |                                                                                                                                                                                      |        |    |                                                                                   |
|-------------------------|-------------------------------------------------------|---------------------------------|-------------------|--------|--------|-------------------------------------------------------------------------|---------------------------|-------------------------------------------------|----------------------------------------------------------------|--------|--------------------------------------------------------------------------------------------------------------------------------------------------------------------------------------|--------|----|-----------------------------------------------------------------------------------|
| Visual abnormalities    | Bilateral hypermetropia                               | Cerebral blindness suspected    | Episodic diplopia | No     | No     | Roving eye movements. ERG evidence of cone rod dystrophy. Hypermetropic | nk                        | No                                              | No                                                             | No     | No                                                                                                                                                                                   | No     | nk | No                                                                                |
| Hearing loss            | No                                                    | Profound hearing loss suspected | No                | No     | No     | No                                                                      | nk                        | No                                              | No                                                             | No     | No                                                                                                                                                                                   | No     | nk | No                                                                                |
| Psychomotor development | Mild delay-attends a special class at a normal school | Severe delay                    | Normal            | Normal | Normal | Severe delay                                                            | Mild delay. Walked at 15m | Mild delay at 1y. Functioning at normal school. | At 22m assessed at 18-20m. Developmentally normal in adulthood | Normal | Walked at 2y. Mild delay – requires special education within a normal school. Oromotor dyspraxia, difficulties with expressive language, slow at writing, problems with tripod grip. | Normal | nk | Mild delayed motor development at 7y - now no motor impairment. Otherwise normal. |



# SUPPLEMENTARY DATA

|                                     |                         |                                                                                                  |                                    |                        |                         |                                                                                                    |                         |                                 |                            |    |                                                                                                                                                                                                             |                        |                                            |                                             |
|-------------------------------------|-------------------------|--------------------------------------------------------------------------------------------------|------------------------------------|------------------------|-------------------------|----------------------------------------------------------------------------------------------------|-------------------------|---------------------------------|----------------------------|----|-------------------------------------------------------------------------------------------------------------------------------------------------------------------------------------------------------------|------------------------|--------------------------------------------|---------------------------------------------|
| Subsequent relevant medical history | No                      | Severe failure to thrive. Recurrent infections. Developed hypertrophic cardiomyopathy. Died 11m. | No                                 | No                     | No                      | Apnoea following an inguinal hernia operation. Hypotonia. Recurrent chest infections.              | Asthma                  | Healthy. No subsequent diabetes | nk                         | No | Mild progressive contractures at wrist, elbow, fingers, knees, ankles and toes, affecting gait. Achilles tendon lengthening. Tone and reflexes normal; mild proximal muscle weakness in legs. Poor balance. | No                     | nk                                         | Hypothyroidism at 11½y. Eltroxin treatment. |
| Brain imaging performed             | No                      | MRI (6m): severe hypoplasia of corpus callosum, absence of occipital horn of left ventricle      | No                                 | No                     | No                      | MRI (7m): Partial agenesis of corpus callosum. Dilatation of horns. Hypoplasia of cerebral vermis. | No                      | No imaging                      | CT (19y): normal           | No | No                                                                                                                                                                                                          | No                     | nk                                         | No                                          |
| Last recorded weight percentile     | 75 <sup>th</sup> at 8½y | <<0.4 <sup>th</sup> at 11m                                                                       | 75 <sup>th</sup> -90 <sup>th</sup> | 99 <sup>th</sup> at 7m | 50 <sup>th</sup> at 13m | 75 <sup>th</sup> at 1y 8m                                                                          | 75 <sup>th</sup> at 18m | 75 <sup>th</sup> at 11y 3m      | 25-50 <sup>th</sup> at 24y | nk | 91 <sup>st</sup> -98 <sup>th</sup> at 15y                                                                                                                                                                   | 2 <sup>nd</sup> at 23m | 50 <sup>th</sup> -75 <sup>th</sup> at 14½m | 75 <sup>th</sup> -91 <sup>st</sup> at 17y   |

# SUPPLEMENTARY DATA

|                                   |                                                                                                                                                              |                            |                                    |                                          |                                           |                              |                         |                            |                                                                                                                                                                      |    |                                           |                        |                          |                                                                 |
|-----------------------------------|--------------------------------------------------------------------------------------------------------------------------------------------------------------|----------------------------|------------------------------------|------------------------------------------|-------------------------------------------|------------------------------|-------------------------|----------------------------|----------------------------------------------------------------------------------------------------------------------------------------------------------------------|----|-------------------------------------------|------------------------|--------------------------|-----------------------------------------------------------------|
| Last recorded length percentile   | 25 <sup>th</sup> at 8½y                                                                                                                                      | <<0.4 <sup>th</sup> at 11m | 75 <sup>th</sup> -91 <sup>st</sup> | 91 <sup>st</sup> -98 <sup>th</sup> at 7y | 91 <sup>st</sup> -98 <sup>th</sup> at 18m | 2 <sup>nd</sup> at 1y 8m     | 75 <sup>th</sup> at 18m | 98 <sup>th</sup> at 11y 3m | 9-25 <sup>th</sup> at 14 y                                                                                                                                           | nk | 75 <sup>th</sup> at 15y                   | 2 <sup>nd</sup> at 23m | 25 <sup>th</sup> at 14½m | 91 <sup>st</sup> at 17y                                         |
| Last recorded OFC percentile      | nk                                                                                                                                                           | <<0.4 <sup>th</sup> at 11m | nk                                 | 50 <sup>th</sup> at 7m                   | 25 <sup>th</sup> at 18m                   | <<0.4 <sup>th</sup> at 1y 8m | nk                      | 98 <sup>th</sup> at 11y 3m | nk                                                                                                                                                                   | nk | 50 <sup>th</sup> -75 <sup>th</sup> at 15y | nk                     | nk                       | 75 <sup>th</sup> -90 <sup>th</sup> at 18y                       |
| Relapse of diabetes and treatment | Relapse of diabetes at 2y 8m. Insulin 2y 8m-4½y. Sulphonyl urea 4½y-5y7m. Tolbutamide 5y 7m-8y. Due to adverse effects changed to Insulin and Daonil 8y-now. | n/a                        | n/a                                | n/a                                      | No                                        | No                           | nk                      | nk                         | Relapse of diabetes at 9½y. Restarted insulin at 12½ y. Puberty at 12-14y. Mainly treated on insulin but at times does not require it and is treated with diet alone | No | No                                        | n/a                    | n/a                      | Relapse of diabetes at 11y. Mainly treated on insulin till now. |

# SUPPLEMENTARY DATA

|                                            |                                                                                                                                                                                                                                                                                                     |                                                                                          |                                       |                                    |                              |                                                                                                                                                                      |    |                      |    |    |    |                                        |                                  |                   |
|--------------------------------------------|-----------------------------------------------------------------------------------------------------------------------------------------------------------------------------------------------------------------------------------------------------------------------------------------------------|------------------------------------------------------------------------------------------|---------------------------------------|------------------------------------|------------------------------|----------------------------------------------------------------------------------------------------------------------------------------------------------------------|----|----------------------|----|----|----|----------------------------------------|----------------------------------|-------------------|
| Any other relevant diabetes investigations | 5y 7m mixed meal tolerance test (90 min Boost test): fasting C-peptide 550 pmol/l; stimulated C-peptide 930 pmol/l; after 3 days of sulphonyl urea omission: fasting C-peptide 270 pmol/l; stimulated C-peptide 490 pmol/l. Used to be good control but since age 8y bad control. HbA1c 9.0% by 8½y | During infections fluctuating blood glucose levels but no ketoacidosis. HbA1c 6.2% by 8m | Repeated normal fasting blood glucose | Normal fasting blood glucose at 9y | Normal fasting blood glucose | One episode of recorded hypoglycaemia (3.4 mmol/l). Two episodes of hyperglycaemia during infection with no associated ketonuria and required insulin on one episode | nk | HbA1C normal at 2.5y | No | No | No | HbA1C 10.5% (normal: 4.1-6.5) at 2y 3m | HbA1C 6.8% (normal 6.5-7%) at 1m | HbA1C 6.2% at 18y |
|--------------------------------------------|-----------------------------------------------------------------------------------------------------------------------------------------------------------------------------------------------------------------------------------------------------------------------------------------------------|------------------------------------------------------------------------------------------|---------------------------------------|------------------------------------|------------------------------|----------------------------------------------------------------------------------------------------------------------------------------------------------------------|----|----------------------|----|----|----|----------------------------------------|----------------------------------|-------------------|

# SUPPLEMENTARY DATA

|                    |                                   |                |     |     |    |                                            |                                                 |    |                                        |    |                                                                                                                                                               |    |    |     |
|--------------------|-----------------------------------|----------------|-----|-----|----|--------------------------------------------|-------------------------------------------------|----|----------------------------------------|----|---------------------------------------------------------------------------------------------------------------------------------------------------------------|----|----|-----|
| Other features     | No                                | No             | nk  | nk  | nk | Delayed closure of the anterior fontanelle | Rapid growth in childhood reported by clinician | nk | nk                                     | nk | 5 <sup>th</sup> right digit more contracted than left.                                                                                                        | nk | nk | No  |
| Calcium metabolism | Normal calcium, phosphate and PTH | Normal calcium | n/a | n/a | nk | nk                                         | nk                                              | nk | Normal calcium, phosphate, TFT and PTH | nk | PTH raised (one occasion), subsequently normal; Calcium, phosphate, Vit D normal. EMG neurogenic change; muscle biopsy - variation in fibre size. CPK normal. | nk | nk | n/a |
